# Supplementary material for: An efficient semi-distributed hillslope erosion model for the subhumid Ethiopian Highlands
Source: Copernicus journal article supplement (doi:10.5194/hess-17-1051-2013), 2013-03-08
Supplement: Supplementary file 1 [file hess-17-1051-2013-supplement.pdf]

1

2

3

## **SUPPLEMENTARY MATERIAL**

4

5

6

7

**An efficient semi-distributed hillslope erosion model for the sub**

8

**humid Ethiopian Highlands**

9

10

11

12 **S1. Scatter plot runoff and sediment concentration for Anjeni**

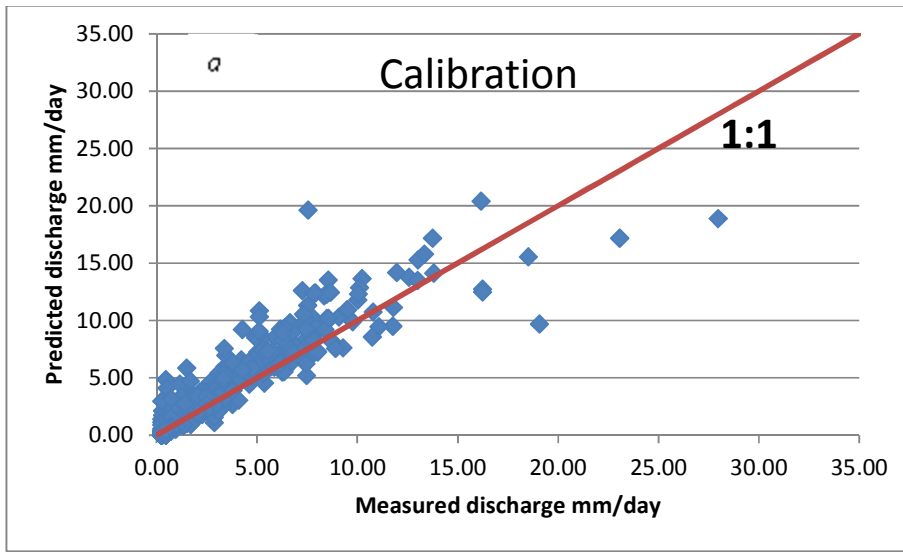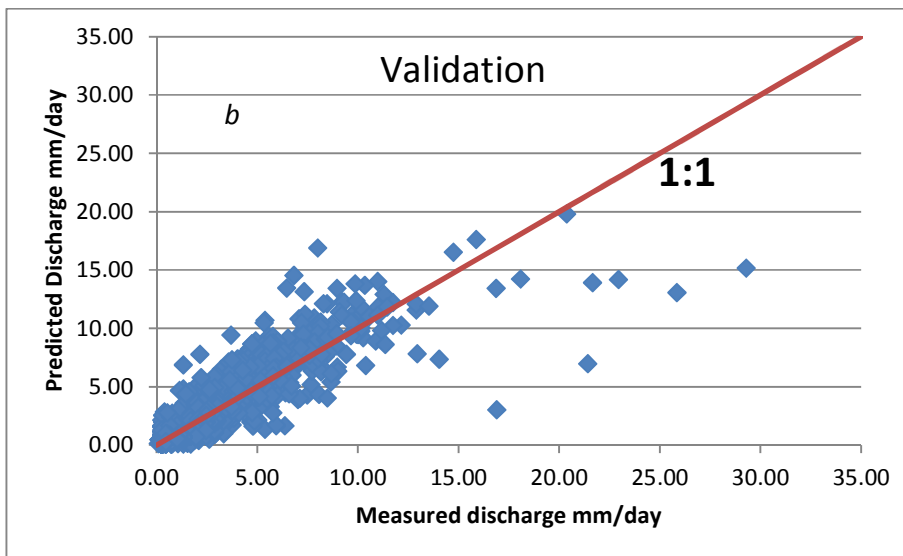

17 **Fig. S1** Comparison of predicted and measured daily stream flow with the 1:1 line (a) for  
18 calibration period (b) for validation period

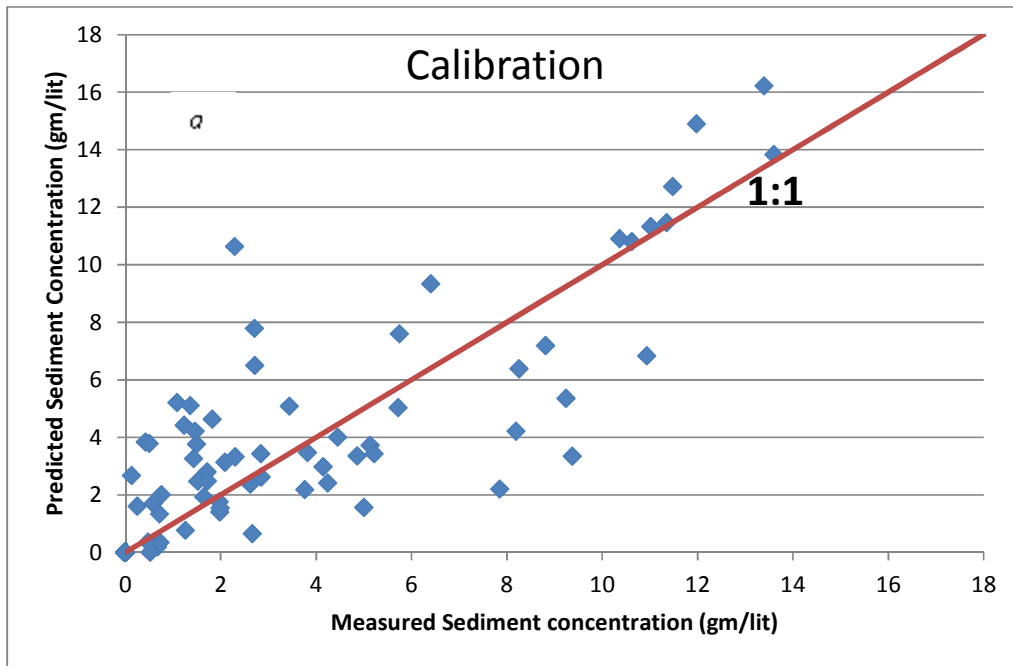

19  
20

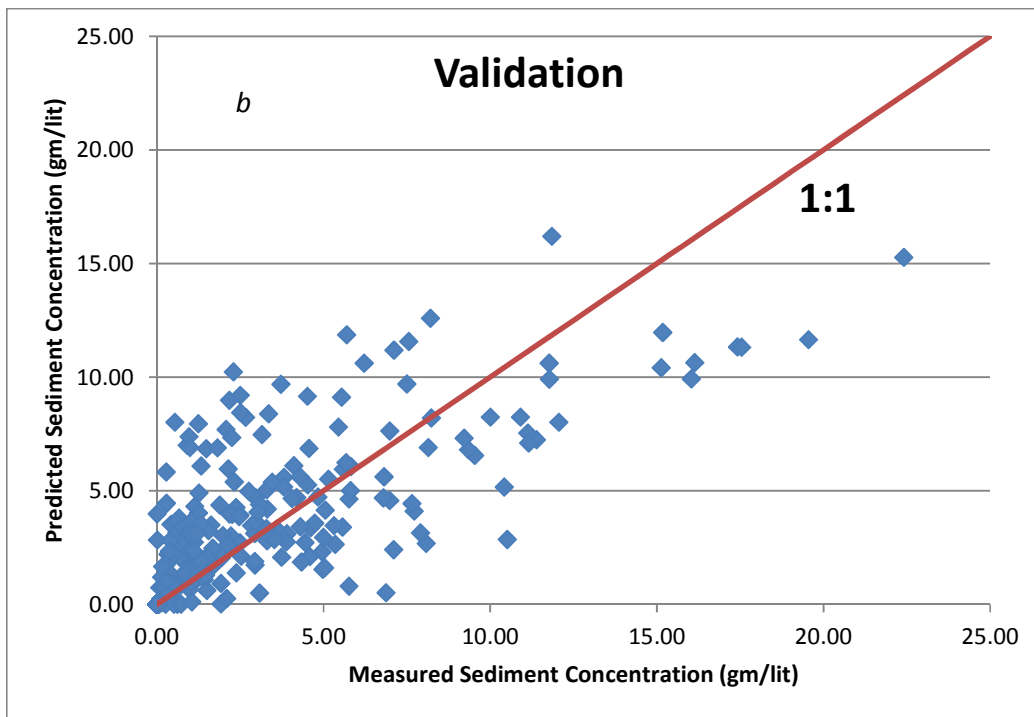

21  
22  
23  
24  
25  
26  
27  
28  
29  
30

**Fig. S2** Comparison of predicted and measured daily sediment concentration with the 1:1 line (a) for calibration period (b) for validation period

31 **S2. Sensitivity analysis for Anjeni**

32

33 The model was fitted visually and not according to any particular statistics. The most  
34 sensitive parameter is the fractional areas that produce runoff and recharge. Increasing the  
35 recharge area by 30% (or 15 % of the total area), the NS efficiency decreases from 0.8 to  
36 0.63. For a 30% decrease of the recharge area, the NSE efficiency remained the same, i.e.,  
37 0.8. A 15% increase in saturated runoff area resulted in a NS efficiency of 0.46, and a 50%  
38 increase of degraded areas from the total area resulted in a NS efficiency of 0.07. The reason  
39 for the sensitivity is that the overall water balance is not met. Moreover changing recharge  
40 areas to runoff areas resulted in peak runoff occurring earlier (Tesemma et al., 2010). As  
41 expected the Nash Sutcliffe efficiency is insensitive to variation in the amount of water that  
42 can be stored in the root zone because the magnitude of the storage affects only the first  
43 runoff events after the rains have started. Since it rains often during the rainy season, the  
44 watershed soils remain near full capacity, and the total size of the storage affects the amount  
45 of recharge or runoff only minimally. This will not be the case for temperate climates where  
46 large storms are more infrequent. Finally, the model is not greatly dependent on the  
47 subsurface flow parameters. Testing has shown that when changing the parameters by a  
48 factor of two the baseflow tail is affected. Since the deviations are small the Nash Sutcliffe  
49 Efficiency (NSE) stays the same but the relative mean square error and the visual appearance  
50 is affected.

51

52 Table S1: Sensitivity analysis of hydrologic parameters in the validation

| Parameters             | Values | NSE  | Parameters                       | Values | NSE  |
|------------------------|--------|------|----------------------------------|--------|------|
| A1                     | 0.02   | 0.8  | <b>Smax in A3</b>                | 100    | 0.8  |
| <b>A1 +10%</b>         | 0.022  | 0.8  | <b>Smax in A3 +10%</b>           | 110    | 0.8  |
| <b>A1+20%</b>          | 0.024  | 0.8  | <b>Smax in A3+20%</b>            | 120    | 0.8  |
| <b>A1+30%</b>          | 0.026  | 0.8  | <b>Smax in A3+30%</b>            | 130    | 0.8  |
| <b>A1-10%</b>          | 0.018  | 0.8  | <b>Smax in A3-10%</b>            | 90.91  | 0.8  |
| <b>A1-20%</b>          | 0.017  | 0.8  | <b>Smax in A3-20%</b>            | 83.33  | 0.8  |
| <b>A1-30%</b>          | 0.015  | 0.81 | <b>Smax in A3-30%</b>            | 76.92  | 0.8  |
| A2                     | 0.14   | 0.8  | <b>IF</b>                        | 10     | 0.8  |
| <b>A2 +10%</b>         | 0.154  | 0.8  | <b><math>\tau^*</math> +10%</b>  | 11     | 0.81 |
| <b>A2+20%</b>          | 0.168  | 0.77 | <b><math>\tau^*</math> +20%</b>  | 12     | 0.81 |
| <b>A2+30%</b>          | 0.182  | 0.76 | <b><math>\tau^*</math> +30%</b>  | 13     | 0.81 |
| <b>A2-10%</b>          | 0.127  | 0.81 | <b><math>\tau^*</math> -10%</b>  | 9.091  | 0.8  |
| <b>A2-20%</b>          | 0.117  | 0.81 | <b><math>\tau^*</math> -20%</b>  | 8.333  | 0.79 |
| <b>A2-30%</b>          | 0.108  | 0.82 | <b><math>\tau^*</math> -30%</b>  | 7.692  | 0.78 |
| A3                     | 0.5    | 0.8  | <b><math>t_{1/2}</math></b>      | 70     | 0.8  |
| <b>A3 +10%</b>         | 0.55   | 0.77 | <b><math>t_{1/2}</math> +10%</b> | 77     | 0.8  |
| <b>A3+20%</b>          | 0.6    | 0.71 | <b><math>t_{1/2}</math> +20%</b> | 84     | 0.8  |
| <b>A3+30%</b>          | 0.65   | 0.63 | <b><math>t_{1/2}</math> +30%</b> | 91     | 0.8  |
| <b>A3-10%</b>          | 0.45   | 0.81 | <b><math>t_{1/2}</math> -10%</b> | 63.64  | 0.8  |
| <b>A3-20%</b>          | 0.42   | 0.81 | <b><math>t_{1/2}</math> -20%</b> | 58.33  | 0.81 |
| <b>A3-30%</b>          | 0.38   | 0.8  | <b><math>t_{1/2}</math> -30%</b> | 53.85  | 0.81 |
| Smax in A1             | 200    | 0.8  | <b>BSmax</b>                     | 100    | 0.8  |
| <b>Smax in A1 +10%</b> | 220    | 0.8  | <b>BSmax+10%</b>                 | 110    | 0.8  |
| <b>Smax in A1+20%</b>  | 240    | 0.8  | <b>BSmax+20%</b>                 | 120    | 0.8  |
| <b>Smax in A1+30%</b>  | 260    | 0.8  | <b>BSmax+30%</b>                 | 130    | 0.8  |
| <b>Smax in A1-10%</b>  | 181.8  | 0.8  | <b>BSmax-10%</b>                 | 90.91  | 0.8  |
| <b>Smax in A1-20%</b>  | 166.7  | 0.8  | <b>BSmax-20%</b>                 | 83.33  | 0.8  |
| <b>Smax in A1-30%</b>  | 153.8  | 0.8  | <b>BSmax-30%</b>                 | 76.92  | 0.8  |
| Smax in A2             | 10     | 0.8  | <b><math>a_2</math></b>          | 3.4    | 0.64 |
| <b>Smax in A2 +10%</b> | 11     | 0.8  | <b><math>a_2</math> + 10%</b>    | 3.74   | 0.63 |
| <b>Smax in A2+20%</b>  | 12     | 0.8  | <b><math>a_2</math> + 20%</b>    | 4.08   | 0.61 |
| <b>Smax in A2+30%</b>  | 13     | 0.8  | <b><math>a_2</math> + 30%</b>    | 4.42   | 0.57 |
| <b>Smax in A2-10%</b>  | 9.09   | 0.8  | <b><math>a_2</math> - 10%</b>    | 3.091  | 0.63 |
| <b>Smax in A2-20%</b>  | 8.33   | 0.8  | <b><math>a_2</math> - 20%</b>    | 2.833  | 0.62 |
| <b>Smax in A2-30%</b>  | 7.69   | 0.8  | <b><math>a_2</math> - 30%</b>    | 2.615  | 0.59 |

53

54

55 **S3. Details for sediment model**

56 The sediment model in this paper “closely” follows the Hairsine and Rose (1992a) model. As  
 57 detailed below, it was showed that, for sheet flow, the sediment concentration ( $\text{kg/m}^3$ ) at the  
 58 transport limit,  $c_t$ , can be expressed in

59 
$$C_t = \frac{F\sigma SV}{\left(\frac{\sigma}{\rho}-1\right)\varphi_e} \quad 1$$

60  $F$  is the fraction of the stream power effective in erosive processes,  $S$  (m/m) is the slope of  
 61 the land surface,  $V$  (m/s) is mean overland flow velocity  $\varphi_e$  (m/s) is the effectiv depositability  
 62 and  $\sigma$  ( $\text{kg/m}^3$ ) and  $\rho$  ( $\text{kg/m}^3$ ) are soil particle and water density, respectively.

63 The following derivation was derived first by Yu et al (1997). It is closely followed here with  
 64 some minor modifications. In this derivation a sloping field of unit width and a length  $L$  and a  
 65 rainfall rate  $R$  (m/s) is considered. The runoff at the end of the field is  $q$  ( $\text{m}^2/\text{s}$ ).

66 
$$q = hV = RL \quad 2$$

67 Where  $h$  is the depth of the water at  $L$  Assuming kinematic flow approximation and flow to  
 68 be turbulent we can write manning equation for a the cross section at  $L$  where the width is  
 69 many time greater than the depth

70 
$$V = \frac{1}{n} h^{2/3} S^{1/2} \quad 3$$

71 Combining Eqs. 2 (i.e.,  $q = hV$ ) and 3 gives

72 
$$q = kh^{5/3} \quad 4$$

73 Where,  $k=1/n*S^{1/2} \quad 5$

74 Using the relationship in Eq. 2 (i.e.,  $h = \frac{RL}{q}$ ) and substituting this in Eqs 4 and 5 and  
 75 rearranging we find that

76 
$$V = \left(\frac{\sqrt{S}}{n}\right)^{3/5} L^{2/5} R^{2/5} \quad 6$$

77 By substitution of Eq. 6 into Eq. 1 we find that

78 
$$C_t = aQ^{0.4}$$

79 Where

$$a = \frac{F\sigma SL^{2/5}}{\left(\frac{\sigma}{\rho}-1\right)\varphi_e} \left(\frac{\sqrt{S}}{n}\right)^{3/5}$$

80 Therefore “ $a$ ” is a function of both watershed and sediment characteristics.

81 For sediment load per unit area  $Y_t$  :

82 
$$Y_t = C_t * Q = a * A * Q^{1.4}$$

83
